# Supplementary material
Source: publisher site journal article supplement (https://static.cambridge.org/content/id/urn:cambridge.org:id:article:S0317167120001390/resource/name/S0317167120001390supp001.xlsx)
Supplement: Supplementary file 1 [file S0317167120001390supp001.xlsx]

## Sheet: Supplementary Table 1
	CJD	definite	98
		probable	24
	non-CJD	Neurodegenerative	74
		encephalitis (infectious and non-infectious)	71
		cerebrovascular	28
		metabolic and intoxications	11
		neoplastic	9
		seizure disorders	6
		psychiatric	13
		other	10
	unknown, but not suspected CJD		279
	Supplementary Table 1. Composition of Patient Group

## Sheet: Supplementary Table 2
	Mutations Detected	Samples in Cohort
	1 OPRD*	2
	4 OPRI**	1
	P68P	1
	A117A	5
	D178N (129 MM)***	1
	E200K	4
	V210I	1
	none	69
	* (number) octapeptide repeat deletions detected in PRNP gene
	** (number) octapeptide repeat insertions detected in PRNP gene
	***D178N in conjunction with methionine at the codon129 polymorphic site of the mutant allele (cis-129M)=FFI
	Supplementary Table 2. Genetic analyses of the PRNP gene of 84 patients revealed 15 mutations.
